# Supplementary material for: Microbial Phenolic Metabolites: Which Molecules Actually Have an Effect on Human Health?
Source: MDPI journal article supplement (doi:10.3390/nu11112725), 2019-11-10
Supplement: s1 [file s1]

Table S1. Principal MPM found in biological fluids after feeding trials in humans.

| GUT MICROBIOTA METABOLITES         | FOOD SOURCE                                                                                                          | SAMPLE TYPE                        | REFERENCES                      |
|------------------------------------|----------------------------------------------------------------------------------------------------------------------|------------------------------------|---------------------------------|
| <b>BENZOATES</b>                   |                                                                                                                      |                                    |                                 |
| Methyl 4-hydroxybenzoate           | Red raspberry                                                                                                        | Breast milk, plasma, urine         | [24]                            |
| Methyl-3,4-dihydroxybenzoate       | Red raspberry                                                                                                        | Breast milk, plasma, urine         | [24]                            |
| <b>HYDROXYBENZALDEHYDES</b>        |                                                                                                                      |                                    |                                 |
| 4-Hydroxybenzaldehyde              | Red raspberry                                                                                                        | Breast milk, plasma, urine         | [24]                            |
| 4-Hydroxybenzaldehyde glucuronide  | Red raspberry                                                                                                        | Urine                              | [24]                            |
| 3,4-Dihydroxybenzaldehyde          | Red raspberry                                                                                                        | Breast milk, plasma, urine         | [24]                            |
| <b>HYDROXYBENZOIC ACIDS</b>        |                                                                                                                      |                                    |                                 |
| Benzoic acid sulphate              | Orange juice                                                                                                         | Urine                              | [26,28]                         |
| 3-Hydroxybenzoic acid              | Capsule of epicatechin, cocoa, coffee, grape extract, red wine, tea, tomato sauce                                    | Faeces, plasma, urine              | [35,42,43,45,50,51,71,73]       |
| 3-Hydroxybenzoic acid sulphate     | Orange juice                                                                                                         | Urine                              | [26,28]                         |
| 3-Hydroxybenzoic acid glucuronide  | Orange juice, red raspberry                                                                                          | Breast milk, urine                 | [24,28]                         |
| 4-Hydroxybenzoic acid              | Capsule of epicatechin and procyanidin B1, cocoa, grape extract, orange juice, red raspberry, red wine, tomato sauce | Breast milk, faeces, plasma, urine | [20,24,27,28,42,43,45,50,71,73] |
| 4-Hydroxybenzoic acid glucuronide  | Red raspberry                                                                                                        | Breast milk, urine                 | [24]                            |
| 4-Hydroxybenzoic acid sulphate     | Orange juice, red raspberry                                                                                          | Breast milk, urine                 | [24,28]                         |
| 2,3-Dihydroxybenzoic acid          | Red raspberry                                                                                                        | Breast milk, plasma, urine         | [24]                            |
| 2,4-Dihydroxybenzoic acid          | Red raspberry                                                                                                        | Urine                              | [24]                            |
| 2,6-Dihydroxybenzoic acid          | Red raspberry                                                                                                        | Breast milk, plasma, urine         | [24]                            |
| 3,4-Dihydroxybenzoic acid          | Coffee, grape extract, orange juice, red raspberry                                                                   | Breast milk, plasma, urine         | [24,28,35,71]                   |
| 3,4-Dihydroxybenzoic acid sulphate | Red raspberry                                                                                                        | Breast milk, urine                 | [24]                            |
| 3,5-Dihydroxybenzoic acid          | Red wine                                                                                                             | Faeces                             | [50,70]                         |

|                                           |                                                                           |                                                   |                     |
|-------------------------------------------|---------------------------------------------------------------------------|---------------------------------------------------|---------------------|
| <b>3-Methoxy-4-hydroxybenzoic acid</b>    | Coffee, orange juice                                                      | Plasma, urine                                     | [28,35]             |
| <b>3-Hydroxy-4-methoxybenzoic acid</b>    | Orange juice                                                              | Urine                                             | [28]                |
| Hydroxy-dimethoxybenzoic acid glucuronide | Grape extract                                                             | Urine                                             | [65]                |
| <b>Gallic acid</b>                        | Grape extract, pomegranate extract, red raspberry, red wine               | Breast milk, colon tissues, faeces, plasma, urine | [24,50,54,66]       |
| Gallic acid glucuronide                   | Tea                                                                       | Blister fluids, skin biopsies                     | [51]                |
| Gallic acid sulphate                      | Tea                                                                       | Plasma                                            | [51]                |
| <b>3-Methylgallic acid</b>                | Grape extract, red wine                                                   | Faeces, urine                                     | [50,66,70]          |
| <b>4-Methylgallic acid sulphate</b>       | Grape extract, tea                                                        | Blister fluids, plasma, skin biopsies, urine      | [51,66]             |
| <b>3,4-Dimethylgallic acid</b>            | Grape extract                                                             | Urine                                             | [66]                |
| <b>Vanillic acid</b>                      | Capsule of epicatechin and procyanidin B1, cocoa, red raspberry, red wine | Breast milk, faeces, plasma, urine                | [24,42,43,45,50,70] |
| Vanillic acid sulphate                    | Grape extract, red raspberry                                              | Breast milk, urine                                | [24,66]             |
| Vanillic acid glucuronide                 | Almond skin, grape extract, red raspberry                                 | Breast milk, plasma, urine                        | [24,71,65]          |
| <b>Isovanillic acid</b>                   | Red raspberry                                                             | Breast milk, urine                                | [24]                |
| Isovanillic acid glucuronide              | Red raspberry                                                             | Breast milk, plasma, urine                        | [24]                |
| Isovanillic acid sulphate                 | Red raspberry                                                             | Breast milk, urine                                | [24]                |
| <b>Protocatechuic acid</b>                | Capsule of epicatechin and procyanidin B1, cocoa, red wine                | Faeces, plasma, urine                             | [42,43,45,50,70]    |
| <b>Syringic acid</b>                      | Grape extract, red wine                                                   | Urine, faeces                                     | [20,50,66,70]       |
| Syringic acid sulphate                    | Tea                                                                       | Blister fluids, plasma                            | [51]                |
| Syringic acid glucuronide                 | Tea                                                                       | Blister fluids                                    | [51]                |
| <b>Ellagic acid</b>                       | Pomegranate extract                                                       | Colon tissues                                     | [54]                |
| <b>Methyl-ellagic acid</b>                | Pomegranate extract                                                       | Colon tissues, urine                              | [54]                |
| Methyl-ellagic acid glucuronide           | Pomegranate extract                                                       | Urine                                             | [54]                |
| <b>Dimethyl-ellagic acid</b>              | Pomegranate extract                                                       | Colon tissues, urine                              | [54]                |
| Dimethyl-ellagic acid glucuronide         | Pomegranate extract                                                       | Colon tissues, urine                              | [54]                |
| <b>Valoneic acid dilactone</b>            | Pomegranate extract                                                       | Colon tissues                                     | [54]                |
| <b>Gallagic acid dilactone</b>            | Pomegranate extract                                                       | Colon tissues                                     | [54]                |

|                                        |                                                                                                                      |                                    |                              |
|----------------------------------------|----------------------------------------------------------------------------------------------------------------------|------------------------------------|------------------------------|
| <b>Vanilloylglycine</b>                | Grape extract                                                                                                        | Urine                              | [65]                         |
| <b>HYDROXYCINNAMIC ACIDS</b>           |                                                                                                                      |                                    |                              |
| <b><i>m</i>-Coumaric acid</b>          | Capsule of epicatechin and procyanidin B1, cocoa, red raspberry, tomato sauce, orange juice                          | Breast milk, plasma, urine         | [24,28,43,45,70]             |
| <b><i>p</i>-Coumaric acid</b>          | Capsule of epicatechin and procyanidin B1, cocoa, grape extract, red raspberry, red wine, tomato sauce, orange juice | Breast milk, faeces, plasma, urine | [20,24,28,42,43,45,50,66,70] |
| Coumaric acid glucuronide              | Coffee, orange juice, red raspberry, tomato sauce                                                                    | Breast milk, plasma, urine         | [24,28,35,70]                |
| Coumaric acid sulphate                 | Coffee, orange juice, red raspberry, tomato sauce                                                                    | Breast milk, plasma, urine         | [24,26,28,35,70]             |
| <b>Dihydrocoumaric acid</b>            | Coffee                                                                                                               | Urine                              | [35]                         |
| Dihydrocoumaric acid glucuronide       | Coffee                                                                                                               | Urine                              | [35]                         |
| Dihydrocoumaric acid sulphate          | Coffee                                                                                                               | Urine                              | [35]                         |
| <b>Coumaroylquinic acid</b>            | Coffee                                                                                                               | Urine                              | [35]                         |
| <b>Dihydrocoumaroylquinic acid</b>     | Coffee                                                                                                               | Plasma, urine                      | [35]                         |
| <b>Caffeic acid</b>                    | Cocoa, coffee, grape extract, orange juice, red raspberry, red wine, tomato sauce                                    | Faeces, plasma, urine              | [20,24,28,35,42,45,50,66,70] |
| Caffeic acid glucuronide               | Orange juice, tomato sauce                                                                                           | Urine                              | [28,70]                      |
| Caffeic acid sulphate                  | Coffee, grape extract, orange juice, red raspberry, tomato sauce                                                     | Breast milk, plasma, urine         | [24,26,28,35,66,70]          |
| <b>Dihydrocaffeic acid</b>             | Coffee, tomato sauce                                                                                                 | Plasma, urine                      | [35,70]                      |
| Dihydrocaffeic acid glucuronide        | Coffee, grape extract, tomato sauce                                                                                  | Urine                              | [35,66,70]                   |
| Dihydrocaffeic acid sulphate           | Coffee, red raspberry, tomato sauce                                                                                  | Urine, breast milk, plasma         | [24,35,70]                   |
| <b>3-Caffeoylquinic acid</b>           | Coffee                                                                                                               | Urine                              | [35]                         |
| <b>5-Caffeoylquinic acid</b>           | Coffee, tomato sauce                                                                                                 | Plasma, urine                      | [35,70]                      |
| <b>4-Caffeoylquinic acid</b>           | Coffee                                                                                                               | Urine                              | [35]                         |
| Caffeoylquinic lactone sulphate        | Coffee                                                                                                               | Urine                              | [35]                         |
| <b>3-Dihydrocaffeoylquinic acid</b>    | Coffee                                                                                                               | Urine                              | [35]                         |
| <b>5-Dihydrocaffeoylquinic acid</b>    | Coffee                                                                                                               | Urine                              | [35]                         |
| <b>4-Dihydrocaffeoylquinic acid</b>    | Coffee                                                                                                               | Urine                              | [35]                         |
| Dihydrocaffeoylquinic acid glucuronide | Coffee                                                                                                               | Urine                              | [35]                         |

|                                      |                                                                                                               |                                    |                                 |
|--------------------------------------|---------------------------------------------------------------------------------------------------------------|------------------------------------|---------------------------------|
| <b>Dimethoxycinnamic acid</b>        | Coffee                                                                                                        | Plasma                             | [35]                            |
| <b>Dihydrodimethoxycinnamic acid</b> | Coffee                                                                                                        | Plasma, urine                      | [35]                            |
| <b>Ferulic acid</b>                  | Capsule of epicatechin and procyanidin B1, cocoa, coffee, orange juice, red raspberry, red wine, tomato sauce | Breast milk, faeces, plasma, urine | [20,24,26,28,35,42,43,45,50,70] |
| Ferulic acid glucuronide             | Almond skin, coffee, orange juice, red raspberry, tomato sauce                                                | Breast milk, plasma, urine         | [24,26,28,35,70,71]             |
| Ferulic acid sulphate                | Coffee, grape extract, orange juice, red raspberry, tomato sauce                                              | Breast milk, plasma, urine         | [24,26,28,35,66,70]             |
| <b>Hydroferulic acid</b>             | Tomato sauce                                                                                                  | Urine                              | [70]                            |
| Hydroferulic acid glucuronide        | Tomato sauce                                                                                                  | Urine                              | [70]                            |
| Hydroferulic acid sulphate           | Tomato sauce                                                                                                  | Urine                              | [70]                            |
| <b>Dihydroferulic acid</b>           | Coffee                                                                                                        | Plasma, urine                      | [70]                            |
| Dihydroferulic acid glucuronide      | Coffee, grape extract, red raspberry                                                                          | Breast milk, plasma, urine         | [24,35,66]                      |
| Dihydroferulic acid sulphate         | Coffee, grape extract, red raspberry                                                                          | Breast milk, plasma, urine         | [24,35,66]                      |
| <b>Feruloylglycine</b>               | Coffee, red wine                                                                                              | Plasma, urine                      | [20,35]                         |
| <b>3-Feruloylquinic acid</b>         | Coffee                                                                                                        | Urine                              | [35]                            |
| <b>5-Feruloylquinic acid</b>         | Coffee                                                                                                        | Plasma, urine                      | [35]                            |
| <b>4-Feruloylquinic acid</b>         | Coffee                                                                                                        | Plasma, urine                      | [35]                            |
| Feruloylquinic lactone glucuronide   | Coffee                                                                                                        | Plasma                             | [35]                            |
| <b>Isoferulic acid</b>               | Coffee, orange juice                                                                                          | Plasma, urine                      | [28,35]                         |
| Isoferulic acid glucuronide          | Coffee, orange juice                                                                                          | Urine                              | [26,28,35]                      |
| Isoferulic acid sulphate             | Coffee, grape extract, orange juice                                                                           | Urine                              | [28,35,66]                      |
| <b>Dihydroisoferulic acid</b>        | Coffee                                                                                                        | Plasma                             | [35]                            |
| Dihydroisoferulic acid glucuronide   | Coffee                                                                                                        | Plasma, urine                      | [35]                            |
| Dihydroisoferulic acid sulphate      | Coffee                                                                                                        | Plasma, urine                      | [35]                            |
| 3-Dihydroferuloylquinic acid         | Coffee                                                                                                        | Plasma, urine                      | [35]                            |
| 5-Dihydroferuloylquinic acid         | Coffee                                                                                                        | Plasma, urine                      | [35]                            |
| 4-Dihydroferuloylquinic acid         | Coffee                                                                                                        | Urine                              | [35]                            |
| <b>Isoferuloylglycine</b>            | Coffee                                                                                                        | Urine                              | [35]                            |
| <b>HYDROXYCOUMARINS</b>              |                                                                                                               |                                    |                                 |

|                                             |                                                |                                           |                  |
|---------------------------------------------|------------------------------------------------|-------------------------------------------|------------------|
| <b>Urolithin A</b>                          | Pomegranate extract, red raspberry, strawberry | Breast milk, colon tissues, plasma, urine | [24,53,54]       |
| Urolithin A glucuronide                     | Pomegranate extract, red raspberry, strawberry | Breast milk, colon tissues, plasma, urine | [24,53,54]       |
| Urolithin A sulphate                        | Pomegranate extract                            | Colon tissues, plasma, urine              | [54]             |
| Urolithin A sulphate glucuronide            | Pomegranate extract                            | Plasma, urine                             | [54]             |
| <b>Isourolithin A</b>                       | Pomegranate extract                            | Colon tissues, plasma, urine              | [54]             |
| Isourolithin A glucuronide                  | Pomegranate extract                            | Colon tissues, plasma, urine              | [54]             |
| <b>Urolithin B</b>                          | Pomegranate extract, strawberry                | Colon tissues, plasma, urine              | [53,54]          |
| Urolithin B glucuronide                     | Pomegranate extract, red raspberry, strawberry | Breast milk, colon tissues, plasma, urine | [24,53,54]       |
| Urolithin B sulphate                        | Pomegranate extract                            | Colon tissues, plasma, urine              | [54]             |
| <b>Urolithin C</b>                          | Pomegranate extract                            | Colon tissues, urine                      | [54]             |
| Urolithin C glucuronide                     | Pomegranate extract                            | Plasma, urine                             | [54]             |
| Urolithin C sulphate                        | Pomegranate extract                            | Plasma, urine                             | [54]             |
| <b>Urolithin D</b>                          | Pomegranate extract                            | Colon tissues, plasma                     | [54]             |
| <b>Urolithin M5</b>                         | Pomegranate extract                            | Colon tissues                             | [54]             |
| <b>Urolithin M6</b>                         | Pomegranate extract                            | Colon tissues                             | [54]             |
| <b>HYDROXYPHENYLACETIC ACIDS</b>            |                                                |                                           |                  |
| <b>Phenylacetic acid</b>                    | Cocoa, orange juice, red wine, tomato sauce    | Faeces, plasma, urine                     | [26,42,45,50,70] |
| Phenylacetic acid glucuronide               | Tomato sauce                                   | Urine                                     | [70]             |
| Phenylacetic acid sulphate                  | Tomato sauce                                   | Urine                                     | [70]             |
| <b>2-Hydroxyphenylacetic acid</b>           | Grape extract, red raspberry                   | Breast milk, plasma, urine                | [24,66]          |
| 2-Hydroxyphenylacetic acid sulphate         | Almond skin                                    | Urine                                     | [71]             |
| <b>2-Hydroxy-2-phenylacetic acid</b>        | Grape extract                                  | Urine                                     | [66]             |
| 2-(Dihydroxyphenyl)-acetic acid glucuronide | Almond skin                                    | Urine                                     | [71]             |

|                                                      |                                                                                                                              |                                    |                                    |
|------------------------------------------------------|------------------------------------------------------------------------------------------------------------------------------|------------------------------------|------------------------------------|
| 2-(Dihydroxyphenyl)-acetic acid sulphate             | Almond skin                                                                                                                  | Urine                              | [71]                               |
| 2-(Dihydroxyphenyl)-acetic acid sulphate glucuronide | Almond skin                                                                                                                  | Urine                              | [71]                               |
| 2-(Hydroxy-methoxy-phenyl)-acetic acid glucuronide   | Almond skin                                                                                                                  | Urine                              | [71]                               |
| <b>3-Hydroxyphenylacetic acid</b>                    | Capsule of epicatechin and procyanidin B1, cocoa, coffee, grape extract, orange juice, red raspberry, red wine, tomato sauce | Breast milk, faeces, plasma, urine | [24,26,73,28,35,42,43,45,50,66,70] |
| 3-Hydroxyphenylacetic acid sulphate                  | Capsule of epicatechin and procyanidin B1, orange juice, tomato sauce                                                        | Plasma, urine                      | [26,28,43,70]                      |
| Hydroxyphenylacetic acid glucuronide                 | Orange juice, tomato sauce                                                                                                   | Urine                              | [28,70]                            |
| <b>4-Hydroxyphenylacetic acid</b>                    | Capsule of epicatechin and procyanidin B1, grape extract, orange juice, red raspberry, red wine, tomato sauce                | Breast milk, faeces, plasma, urine | [24,26–28,43,50,66,70]             |
| Hydroxyphenylacetic acid sulphate                    | Orange juice, tomato sauce                                                                                                   | Urine                              | [28,70]                            |
| <b>3,4-Dihydroxyphenylacetic acid</b>                | Capsule of epicatechin and procyanidin B1, cocoa, coffee, grape extract, orange juice, red raspberry, red wine, tomato sauce | Breast milk, faeces, plasma, urine | [20,24,26,28,35,42,43,45,66,70]    |
| <b>3-Methoxy-4-hydroxyphenylacetic acid</b>          | Cocoa, coffee, orange juice                                                                                                  | Urine                              | [26–28,35,42,45]                   |
| Methoxyphenylacetic acid glucuronide                 | Orange juice                                                                                                                 | Urine                              | [26,28]                            |
| 3'-Methoxyphenylacetic acid sulphate                 | Orange juice                                                                                                                 | Urine                              | [26,28]                            |
| <b>4-Methoxy-3-hydroxyphenylacetic acid</b>          | Coffee                                                                                                                       | Urine                              | [35]                               |
| 4'-Methoxyphenylacetic acid sulphate                 | Orange juice                                                                                                                 | Urine                              | [26,28]                            |
| <b>Homovanillic acid</b>                             | Grape extract, red raspberry, red wine, tomato sauce                                                                         | Breast milk, plasma, urine         | [20,24,66,70]                      |
| Homovanillic acid sulphate                           | Grape extract, tea                                                                                                           | Plasma, urine                      | [48,66]                            |
| <b>Isohomovanillic acid</b>                          | Red raspberry                                                                                                                | Breast milk, plasma, urine         | [24]                               |
| <b>3'-Methoxy-4'-hydroxymandelic acid</b>            | Orange juice                                                                                                                 | Urine                              | [26,28]                            |
| <b>4'-Hydroxymandelic acid</b>                       | Orange juice                                                                                                                 | Urine                              | [26,28]                            |
| <b>HYDROXYPHENYLPENTANOIC ACIDS</b>                  |                                                                                                                              |                                    |                                    |
| <b>4-Hydroxy-5-(phenyl)-valeric acid</b>             | Red wine                                                                                                                     | Faeces                             | [50,67,68]                         |
| 4-Hydroxy-5-(phenyl)-valeric acid sulphate           | Almond skin                                                                                                                  | Urine                              | [71]                               |
| <b>4-Hydroxy-5-(hydroxyphenyl)-valeric acid</b>      | Red wine                                                                                                                     | Faeces                             | [50,67,68]                         |

|                                                                         |                                                                                       |                            |                     |
|-------------------------------------------------------------------------|---------------------------------------------------------------------------------------|----------------------------|---------------------|
| 4-Hydroxy-5-(hydroxyphenyl)-valeric acid glucuronide                    | Almond skin                                                                           | Urine                      | [71]                |
| 4-Hydroxy-5-(hydroxyphenyl)-valeric acid sulphate                       | Almond skin                                                                           | Urine                      | [71]                |
| 4-Hydroxy-5-(hydroxyphenyl)-valeric acid methyl sulphate                | Tea                                                                                   | Plasma                     | [48]                |
| 4-Hydroxy-5-(methoxyphenyl)-valeric acid glucuronide                    | Almond skin                                                                           | Urine                      | [71]                |
| 4-Hydroxy-5-(hydroxy-methoxyphenyl)-valeric acid glucuronide            | Almond skin                                                                           | Urine                      | [71]                |
| <b>4-Hydroxy-5-(3',4'-dihydroxyphenyl)-valeric acid</b>                 | Capsule of epicatechin, dark chocolate, grape extract, red wine                       | Faeces, plasma, urine      | [43,44,50,66,68]    |
| 4-Hydroxy-5-(3',4'-dihydroxyphenyl)-valeric acid glucuronide            | Almond skin, dark chocolate, grape extract, tea                                       | Plasma, urine              | [44,48,65,71]       |
| 4-Hydroxy-5-(3',4'-dihydroxyphenyl)-valeric acid methyl glucuronide     | Dark chocolate                                                                        | Urine                      | [44]                |
| 4-Hydroxy-5-(3',4'-dihydroxyphenyl)-valeric acid sulphate               | Almond skin, dark chocolate, grape extract, tea                                       | Plasma, urine              | [44,48,65,71]       |
| 4-Hydroxy-5-(3',4'-dihydroxyphenyl)-valeric acid methyl sulphate        | Dark chocolate, tea                                                                   | Plasma, urine              | [44,48]             |
| 4-Hydroxy-5-(3',5'-dihydroxyphenyl)-valeric acid glucuronide            | Tea                                                                                   | Plasma                     | [48]                |
| 4-Hydroxy-5-(3',5'-dihydroxyphenyl)-valeric acid methyl glucuronide     | Tea                                                                                   | Plasma                     | [48]                |
| 4-Hydroxy-5-(3',4',5'-trihydroxyphenyl)-valeric acid methyl glucuronide | Tea                                                                                   | Plasma                     | [48]                |
| <b>HYDROXYPHENYLPROPANOIC ACIDS</b>                                     |                                                                                       |                            |                     |
| <b>3-Phenylpropionic acid</b>                                           | Orange juice, red wine                                                                | Faeces, urine              | [26,50]             |
| 3-(Phenyl)propionic acid glucuronide                                    | Orange juice                                                                          | Urine                      | [28]                |
| 3-(Phenyl)propionic acid sulphate                                       | Orange juice                                                                          | Urine                      | [28]                |
| <b>3-Hydroxyphenylpropionic acid</b>                                    | Capsule of epicatechin and procyanidin B1, cocoa, coffee, red raspberry, tomato sauce | Breast milk, plasma, urine | [24,35,42,43,45,70] |

|                                                                                   |                                                                           |                       |                  |
|-----------------------------------------------------------------------------------|---------------------------------------------------------------------------|-----------------------|------------------|
| 3-Hydroxyphenylpropionic acid glucuronide                                         | Almond skin, tomato sauce                                                 | Urine                 | [70,71]          |
| 3-Hydroxyphenylpropionic acid sulphate                                            | Red raspberry, tomato sauce                                               | Breast milk, urine    | [24,70]          |
| <b>3-(3'-Hydroxyphenyl)propionic acid</b>                                         | Orange juice, red wine                                                    | Faeces, urine         | [28,50,67,68]    |
| 3-(3'-Hydroxyphenyl)propionic acid glucuronide                                    | Orange juice                                                              | Urine                 | [28]             |
| 3-(3'-Hydroxyphenyl)propionic acid sulphate                                       | Orange juice                                                              | Urine                 | [28]             |
| <b>3-(3'-Hydroxy-4'-methoxyphenyl)propionic acid</b>                              | Orange juice                                                              | Urine                 | [27,28]          |
| 3-(4'-Methoxyphenyl)propionic acid glucuronide                                    | Orange juice                                                              | Urine                 | [26,28]          |
| 3-(4'-Methoxyphenyl)propionic acid sulphate                                       | Orange juice                                                              | Urine                 | [26,28]          |
| <b>3-(4'-Hydroxyphenyl)propionic acid</b>                                         | Grape extract, orange juice                                               | Urine                 | [28,66]          |
| 3-(4'-Hydroxyphenyl)propionic acid glucuronide                                    | Orange juice, tomato sauce                                                | Urine                 | [28,70]          |
| 3-(4'-Hydroxyphenyl)propionic acid sulphate                                       | Orange juice, tomato sauce                                                | Urine                 | [26,28,70]       |
| <b>3-(3'-Methoxy-4'-hydroxyphenyl)propionic acid</b>                              | Orange juice                                                              | Urine                 | [26–28]          |
| 3-(3'-Methoxyphenyl)propionic acid glucuronide                                    | Orange juice                                                              | Urine                 | [26,28]          |
| 3-(3'-Methoxyphenyl)propionic acid sulphate                                       | Orange juice                                                              | Urine                 | [26,28]          |
| <b>3,4-Dihydroxyphenylpropionic acid</b>                                          | Capsule of epicatechin and procyanidin B1, cocoa, grape extract, red wine | Faeces, plasma, urine | [42,43,45,50,66] |
| <b>4-Hydroxyphenylpropionic acid</b>                                              | Capsule of epicatechin and procyanidin B1, cocoa, tomato sauce            | Faeces, plasma, urine | [42,43,70]       |
| 2S-1-(3-4-Dihydroxyphenyl)-3-(2-4-6-trihydroxyphenyl)-propan-2-ol methyl sulphate | Dark chocolate                                                            | Urine                 | [44]             |



|                                                                      |                                                                                                |                                                      |                              |
|----------------------------------------------------------------------|------------------------------------------------------------------------------------------------|------------------------------------------------------|------------------------------|
| 3-(Dihydroxyphenyl)-propionic acid sulphate                          | Almond skin                                                                                    | Urine                                                | [71]                         |
| Dihydrosinapic acid glucuronide                                      | Grape extract                                                                                  | Urine                                                | [65]                         |
| <b>3-(3'-Hydroxy-4'-methoxyphenyl)hydracrylic acid</b>               | Orange juice                                                                                   | Urine                                                | [26–28]                      |
| <b>3-(3'-Hydroxyphenyl)hydracrylic acid</b>                          | Orange juice                                                                                   | Urine                                                | [26–28]                      |
| <b>Hippuric acid</b>                                                 | Cocoa, dark chocolate, grape extract, orange juice, red raspberry, tea                         | Blister fluids, breast milk, plasma, urine           | [24,26–28,42,48,51,66]       |
| Hippuric acid glucuronide                                            | Orange juice                                                                                   | Urine                                                | [28]                         |
| <b>4-Hydroxyhippuric acid</b>                                        | Almond skin, cocoa, coffee, grape extract, orange juice, tomato sauce                          | Plasma, urine                                        | [26–28,35,42,45,65,66,70,71] |
| <b>3-Hydroxyhippuric acid</b>                                        | Almond skin, cocoa, coffee, grape extract, orange juice, tea, tomato sauce                     | Plasma, urine                                        | [20,26–28,35,42,45,48,70,71] |
| <b>VALEROLACTONES</b>                                                |                                                                                                |                                                      |                              |
| <b>5-(3'-Hydroxyphenyl)-<math>\gamma</math>-valerolactone</b>        | Red wine                                                                                       | Faeces                                               | [68]                         |
| 5-(3'-Hydroxyphenyl)- $\gamma$ -valerolactone sulphate               | Almond skin, dark chocolate, tea                                                               | Plasma, urine                                        | [25,44,48,71]                |
| 5-(3'-Hydroxyphenyl)- $\gamma$ -valerolactone glucuronide            | Almond skin, dark chocolate, tea                                                               | Plasma, urine                                        | [25,44,48,71]                |
| 5-(3'-Methoxy,4'-hydroxyphenyl)- $\gamma$ -valerolactone glucuronide | Cocoa, dark chocolate                                                                          | Breast milk, plasma, urine                           | [45,46]                      |
| 5-(3'-Methoxy,4'-hydroxyphenyl)- $\gamma$ -valerolactone sulphate    | Cocoa, dark chocolate                                                                          | Breast milk, urine                                   | [45,46]                      |
| 5-(Hydroxy-methoxy-phenyl)- $\gamma$ -valerolactone glucuronide      | Almond skin, grape extract                                                                     | Urine                                                | [65,71]                      |
| 5-(Hydroxy-methoxy-phenyl)- $\gamma$ -valerolactone sulphate         | Almond skin                                                                                    | Urine                                                | [71]                         |
| <b>5-(3',4'-Dihydroxyphenyl)-<math>\gamma</math>-valerolactone</b>   | Capsule of epicatechin and procyanidin B1, cocoa, dark chocolate, grape extract, red wine, tea | Breast milk, faeces, plasma, urine, ileostomy fluids | [43–45,49,66–68]             |

|                                                                         |                                                                  |                            |                  |
|-------------------------------------------------------------------------|------------------------------------------------------------------|----------------------------|------------------|
| 5-(3',4'-Dihydroxyphenyl)- $\gamma$ -valerolactone methyl               | Capsule of epicatechin                                           | Plasma                     | [43]             |
| 5-(3',4'-Dihydroxyphenyl)- $\gamma$ -valerolactone methyl glucuronide   | Dark chocolate                                                   | Urine                      | [44]             |
| 5-(3',4'-Dihydroxyphenyl)- $\gamma$ -valerolactone methyl sulphate      | Dark chocolate                                                   | Urine                      | [44]             |
| 5-(3',4'-Dihydroxyphenyl)- $\gamma$ -valerolactone glucuronide          | Almond skin, cocoa, dark chocolate, grape extract, red raspberry | Breast milk, plasma, urine | [24,44–46,65,71] |
| 5-(3',4'-Dihydroxyphenyl)- $\gamma$ -valerolactone sulphate             | Almond skin, cocoa, dark chocolate, red raspberry                | Breast milk, plasma, urine | [24,44–46,71]    |
| 5-(3',5'-Dihydroxyphenyl)- $\gamma$ -valerolactone glucuronide          | Tea                                                              | Plasma, urine              | [25,48,51]       |
| 5-(3',5'-Dihydroxyphenyl)- $\gamma$ -valerolactone methyl glucuronide   | Tea                                                              | Plasma                     | [48]             |
| 5-(3',5'-Dihydroxyphenyl)- $\gamma$ -valerolactone sulphate             | Tea                                                              | Plasma, urine              | [25,48,51]       |
| 5-(3',5'-Dihydroxyphenyl)- $\gamma$ -valerolactone methyl sulphate      | Tea                                                              | Plasma                     | [48]             |
| 5-(3',5'-Dihydroxyphenyl)- $\gamma$ -valerolactone disulphate           | Tea                                                              | Urine                      | [25]             |
| 5-(4',5'-Dihydroxyphenyl)- $\gamma$ -valerolactone glucuronide          | Tea                                                              | Plasma, urine              | [25,51]          |
| 5-(4',5'-Dihydroxyphenyl)- $\gamma$ -valerolactone sulphate             | Tea                                                              | Plasma                     | [51]             |
| 5-(4',5'-Dihydroxyphenyl)- $\gamma$ -valerolactone sulphate glucuronide | Almond skin, tea                                                 | Plasma,urine               | [25,48,71]       |
| 5-(4',5'-Dihydroxyphenyl)- $\gamma$ -valerolactone disulphate           | Tea                                                              | Urine                      | [25]             |
| 5-(4',5'-Dihydroxyphenyl)- $\gamma$ -valerolactone methyl glucuronide   | Tea                                                              | Urine                      | [25]             |
| <b>5-(3',4',5'-trihydroxyphenyl)-<math>\gamma</math>-valerolactone</b>  | Tea                                                              | Ileostomy fluids, urine    | [25,49]          |

|                                                                             |                                     |                            |               |
|-----------------------------------------------------------------------------|-------------------------------------|----------------------------|---------------|
| 5-(3',4',5'-trihydroxyphenyl)- $\gamma$ -valerolactone glucuronide          | Tea                                 | Plasma, urine              | [25,48,51]    |
| 5-(3',4',5'-trihydroxyphenyl)- $\gamma$ -valerolactone methyl glucuronide   | Tea                                 | Plasma, urine              | [25,48]       |
| 5-(3',4',5'-trihydroxyphenyl)- $\gamma$ -valerolactone sulphate             | Red raspberry, tea                  | Breast milk, plasma, urine | [24,25,48,51] |
| 5-(3',4',5'-trihydroxyphenyl)- $\gamma$ -valerolactone methyl sulphate      | Tea                                 | Plasma, urine              | [25,48,51]    |
| 5-(3',4',5'-trihydroxyphenyl)- $\gamma$ -valerolactone sulphate glucuronide | Tea                                 | Plasma                     | [48]          |
| 5-(4'-trihydroxyphenyl)- $\gamma$ -valerolactone glucuronide                | Almond skin, tea                    | Plasma, urine              | [48,71]       |
| <b>OTHERS</b>                                                               |                                     |                            |               |
| <b>Phloroglucinol</b>                                                       | Coffee, orange juice, red raspberry | Plasma, urine              | [24,26,28,35] |
| Phloroglucinaldehyde                                                        | Red raspberry                       | Plasma                     | [24]          |
| Catechol (1,2-dihydroxybenzene) methyl sulphate                             | Tea                                 | Plasma                     | [48]          |
| <b>Pyrogallol</b>                                                           | Grape extract, tea                  | Ileostomy fluids, urine    | [49,66]       |
| Pyrogallol(1,2,3-trihydroxy-benzene) sulphate                               | Tea                                 | Plasma                     | [48]          |
| Pyrogallol(1,2,3-trihydroxy-benzene) glucuronide                            | Tea                                 | Plasma                     | [48]          |
| 2-Methylpyrogallol                                                          | Grape extract                       | Urine                      | [66]          |
| Lunularin                                                                   | Grapevine-shoot supplement          | Urine                      | [19]          |
